# Supplementary material for: Ag@Pd bimetallic structures for enhanced electrocatalytic CO2 conversion to CO: an interplay between the strain effect and ligand effect
Source: Royal Society of Chemistry journal article supplement (doi:10.1039/d2nr03079a), 2022-01-01
Supplement: d2nr03079a1.pdf [file d2nr03079a1.pdf]

## Ag@Pd Bimetallic Structures for Enhanced Electrocatalytic CO<sub>2</sub> Conversion to CO: An Interplay between Strain Effect and Ligand Effect

Zuolong Chen<sup>1</sup>, Xiyang Wang<sup>1</sup>, Lei Wang<sup>1</sup>, Yimin A. Wu<sup>1\*</sup>

<sup>1</sup>Department of Mechanical and Mechatronics Engineering, Waterloo Institute for Nanotechnology, Materials Interfaces Foundry, University of Waterloo, Waterloo, Ontario N2L 3G1, Canada

### Supplementary Materials

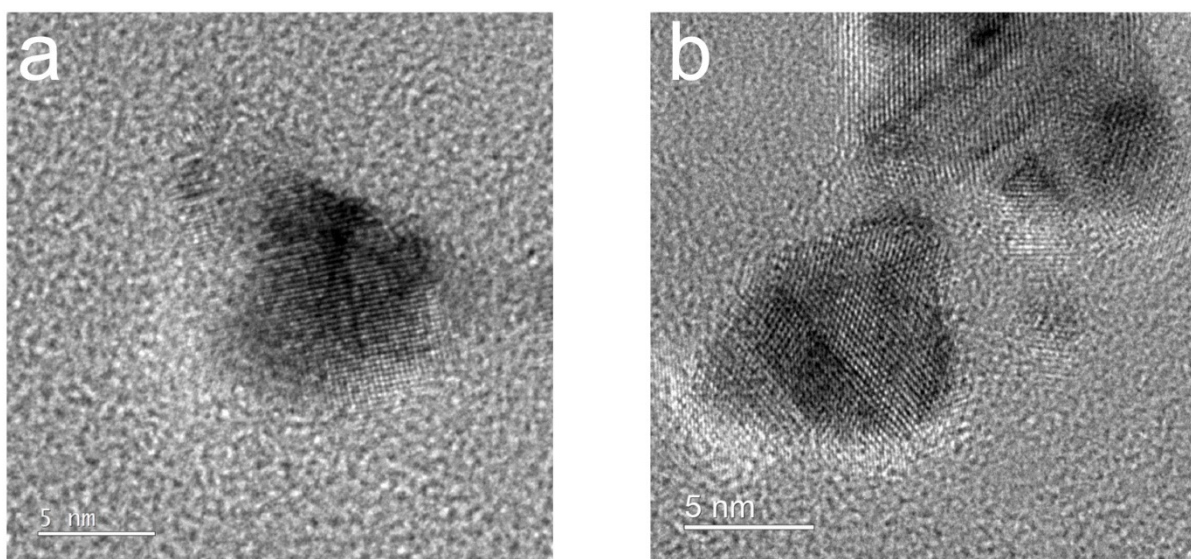

Figure S1 TEM images of (a) Ag@Pd<sub>0.75</sub> and (b) Ag@Pd<sub>3</sub> Nanoparticles

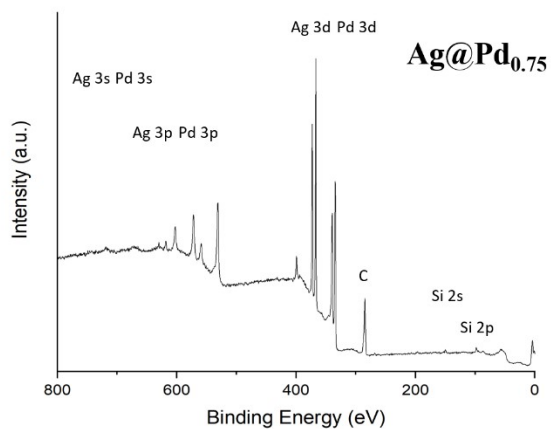

| Sample                      | Pd At% | Ag At% |
|-----------------------------|--------|--------|
| <b>Ag@Pd<sub>0.75</sub></b> | 53.82  | 46.18  |
| <b>Ag@Pd<sub>1.5</sub></b>  | 76.23  | 23.77  |
| <b>Ag@Pd<sub>3</sub></b>    | 84.86  | 15.14  |

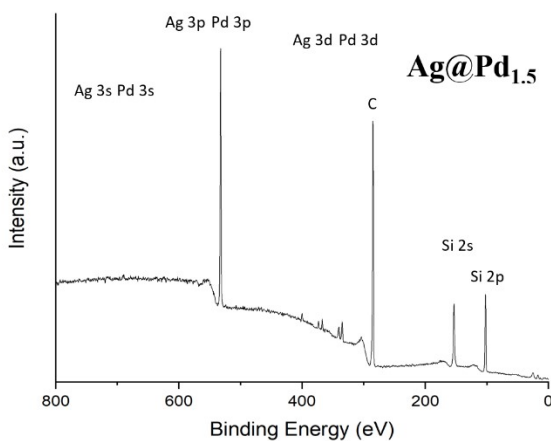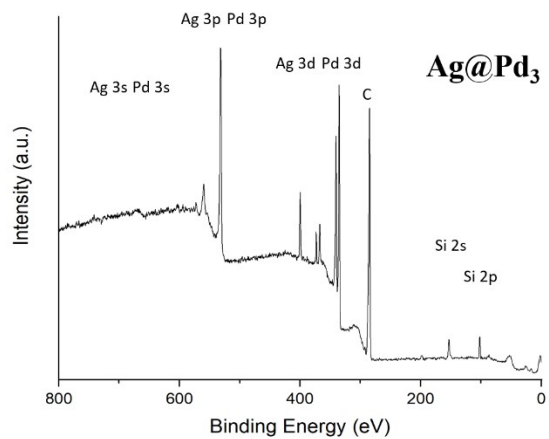

Figure S2 XPS Survey of Ag@Pd Nanoparticles

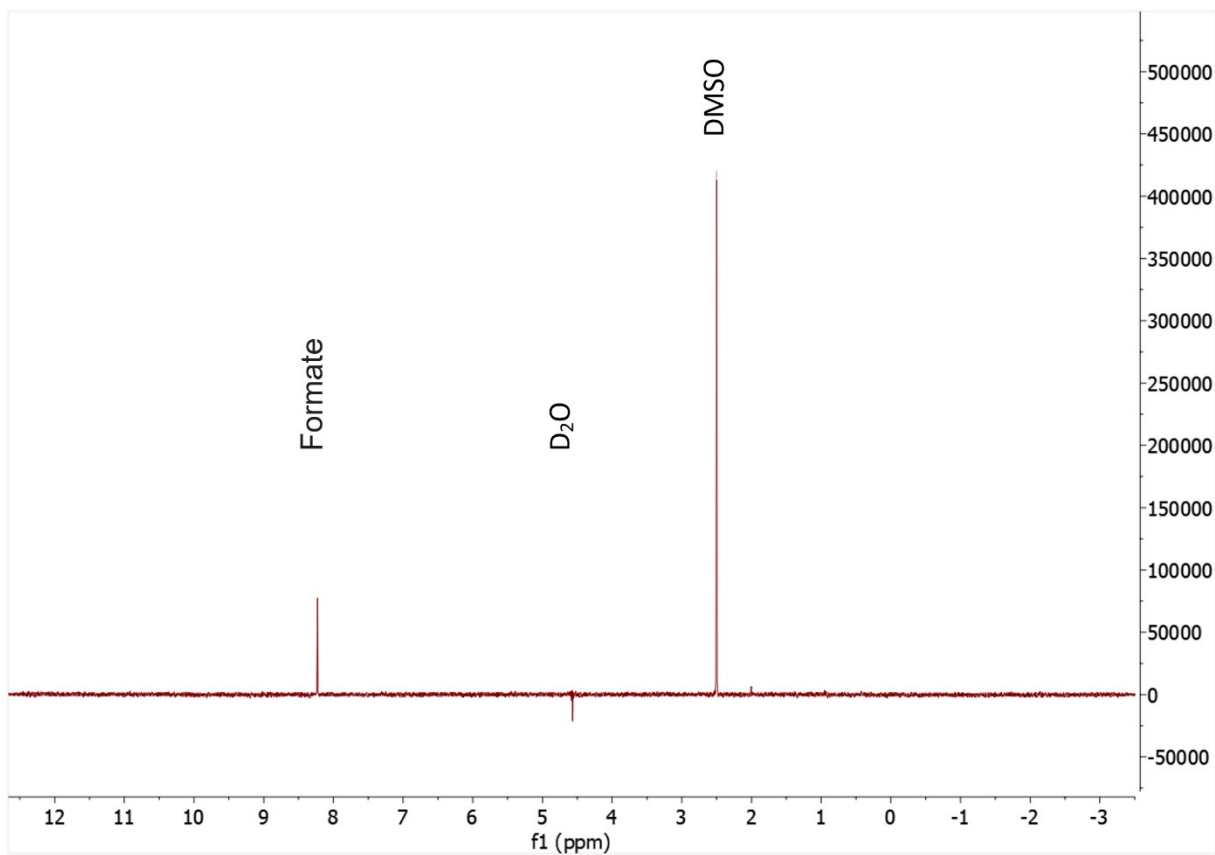

Figure S3 NMR spectrum of the liquid sample after the 22-hour long term stability test of  $\text{Ag@Pd}_{1.5}$

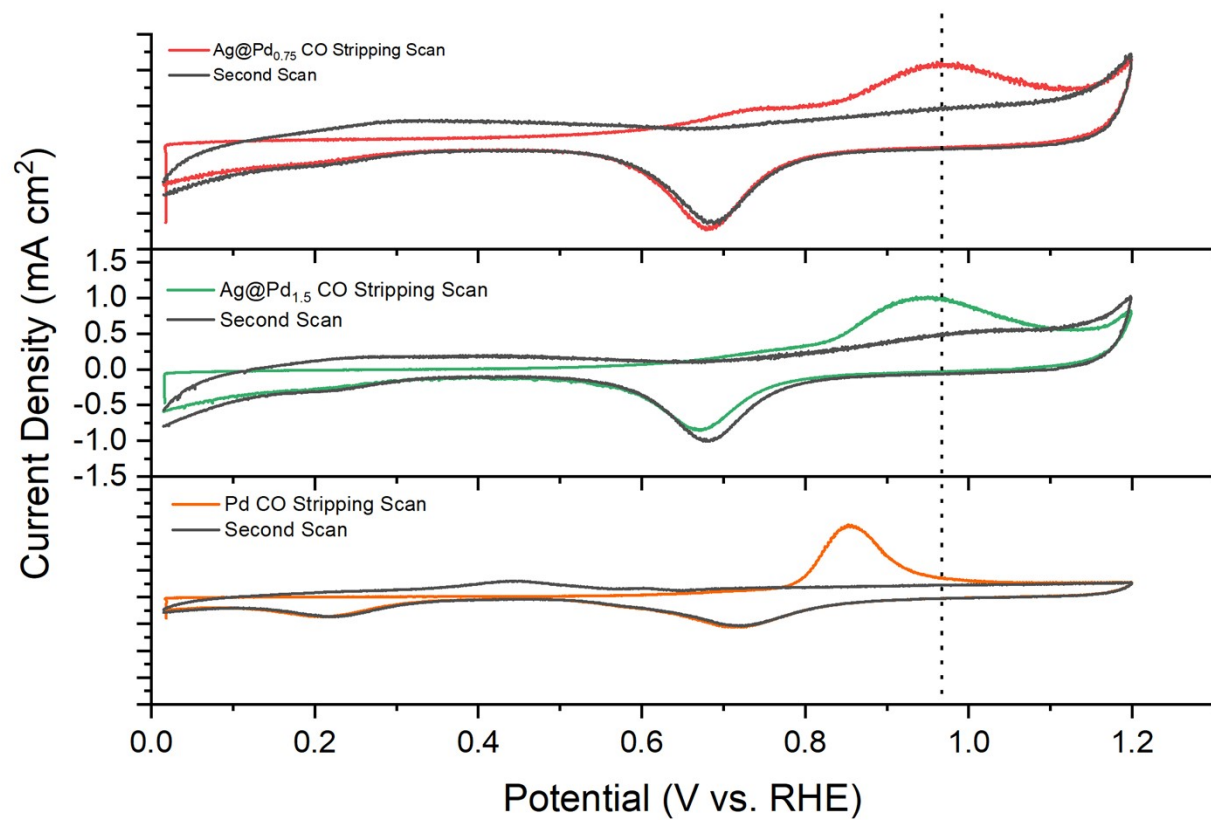

Figure S4 CO Stripping CV. The colored lines represent the CO stripping CV curve, and the black lines represent the second scan after CO is stripped from the Catalyst surface.
